# Supplementary material for: Population Genetic Structure and Reproductive Strategy of the Introduced Grass Centotheca lappacea in Tropical Land-Use Systems in Sumatra
Source: PLoS One. 2016 Jan 25;11(1):e0147633. doi: 10.1371/journal.pone.0147633 (PMC4726506; doi:10.1371/journal.pone.0147633)
Supplement: S3 Table — (XLSX) [file pone.0147633.s005.xlsx]

## Sheet: S3_Table
S3 Table. List of samples analysed by flow cytometry.
Population ID	Number of seeds	Number of fresh leaves	Number of dried leaves
BJ3	1	1	6
BJ4	-	-	3
BJ6	6	7	6
BO3	5	-	3
BO5	3	-	-
BR1	5	-	6
BR2	9	-	5
BR3	5	-	2
BR4	4	-	6
HJ2	21	14	5
HJ3	5	-	4
HO1	5	-	6
HO2	8	-	4
HO3	2	-	4
HO4	7	-	5
HR1	4	-	5
HR2	1	-	6
HR3	1	-	-
HR4	6	-	7
