# Supplementary material for: Population Genetic Structure and Reproductive Strategy of the Introduced Grass Centotheca lappacea in Tropical Land-Use Systems in Sumatra
Source: PLoS One. 2016 Jan 25;11(1):e0147633. doi: 10.1371/journal.pone.0147633 (PMC4726506; doi:10.1371/journal.pone.0147633)
Supplement: S4 Table — (XLSX) [file pone.0147633.s006.xlsx]

## Sheet: S4_Table
S4 Table. Flow cytometry analysis of leaves.
Sample	Variable	N	Mean	Minimum	Maximum	SD	r (P < 0.05)
Dried leaves	G1	93	92.01	63.03	103.63	7.24	0.92
	G2	86	186.55	132.17	211.86	15.97	0.92
	Ratio G1 : G2	86	2.03	1.84	2.31	0.07
	CV% (G1)	93	4.73	3.24	8.4	0.71
	CV% (G2)	86	2.94	0.61	5.48	1.02
Fresh leaves	G1	21	100.37	80.2	114.98	8.93	0.94
	G2	21	199.02	146.11	230	20.77	0.94
	Ratio G1 : G2	21	1.98	1.77	2.07	0.08
	CV% (G1)	21	3.64	2.55	7.22	1.29
	CV% (G2)	21	2.38	1.39	4.57	0.83
